# Supplementary material for: An Interprofessional E-Learning Resource to Prepare Students for Clinical Practice in the Operating Room—A Mixed Method Study from the Students’ Perspective
Source: MDPI journal article supplement (doi:10.3390/healthcare9081028), 2021-08-11
Supplement: s1 [file s1]

## Questionnaire: E-learning resource "Introduction to the OR"

By filling out this questionnaire I give my consent to participation in the study

Age: .....

Sex: ☐ female ☐ male ☐ other

Have you been at an OR-ward before your clinical placement? ☐ yes ☐ no

Have you completed the e-learning resource "Introduction to the OR"?

☐ yes ☐ no **If no, thank you for your participation.**

***If yes, continue to fill out the questionnaire.***

On which digital unit did you carry out the learning activity?

☐ Computer ☐ Mobile phone ☐ Other

Grade to what extent you think that the e-learning resource helped you prepare for clinical practice in the OR?

☐ Very little extent ☐ Little extent ☐ Some extent ☐ Large extent ☐ Very large extent

Grade to what extent you think that the different parts of the e-learning resource helped you prepare for clinical practice in the OR?

### ***OR-design***

☐ Very little extent ☐ Little extent ☐ Some extent ☐ Large extent ☐ Very large extent

### ***Hygiene routine***

☐ Very little extent ☐ Little extent ☐ Some extent ☐ Large extent ☐ Very large extent

### ***Professions working at the OR***

☐ Very little extent ☐ Little extent ☐ Some extent ☐ Large extent ☐ Very large extent

### ***Radiation safety***

☐ Very little extent ☐ Little extent ☐ Some extent ☐ Large extent ☐ Very large extent

### ***Gloving technique***

☐ Very little extent ☐ Little extent ☐ Some extent ☐ Large extent ☐ Very large extent

### ***Surgical hand preparation***

☐ Very little extent ☐ Little extent ☐ Some extent ☐ Large extent ☐ Very large extent

### ***Gowning procedure***

☐ Very little extent ☐ Little extent ☐ Some extent ☐ Large extent ☐ Very large extent

## Questionnaire: E-learning resource "Introduction to the OR"

By filling out this questionnaire I give my consent to participation in the study

To what extent did the e-learning resource "Introduction to the OR" contain the information you needed to be well prepared for your clinical placement?

☐ Very little extent   ☐ Little extent   ☐ Some extent   ☐ Large extent   ☐ Very large extent

Did you lack any specific information? .....

.....

What did you think of the technical design of the e-learning resource? .....

.....

.....

.....

Do you have any suggestions for improvement to further develop of the e-learning resource?

.....

.....

.....

Other comments: .....

.....

.....

.....

.....

.....

.....

Would you recommend other students to carry out the e-learning resource in preparation to their first clinical placement ?

☐ yes   ☐ no

**Thank you for your participation!**
